# Supplementary material
Source: publisher figshare collection journal article supplement (https://acs.figshare.com/ndownloader/files/31614521)
Supplement: Supplementary file 1 [file 31614521]

# Supporting Information for

## Photoactivities of Two Vitamin B Derivatives and Their Applications in the Perpetration of Photoinduced Antibacterial Nanofibrous Membranes

*Zheng Zhang<sup>1</sup>, Bofeng Pan<sup>1</sup>, Luxin Wang<sup>2</sup>, Gang Sun<sup>1\*</sup>*

\*Corresponding author Email: gysun@ucdavis.edu

<sup>1</sup>Department of Biological and Agricultural Engineering

<sup>2</sup>Department of Food Science and Technology

University of California, Davis, CA 95616, United States

Figure S1. Computational UV-vis spectra of (a) FMN and (b) RF in H<sub>2</sub>O.

Figure S2. Computational UV-vis spectra of (a) lumichrome and (b) lumiflavin in H<sub>2</sub>O.

Figure S3. (a) Hydrogen peroxide and (b) singlet oxygen production of 20  $\mu$ M FMN in 10% EtOH/H<sub>2</sub>O solution under CW, UVA (365 nm), and UVB (312 nm) photoirradiation or dark conditions (irradiation in white and dark periods in gray).

Figure S4. Chemical structure of Methylene Blue.

Figure S5. Calibration curve of RF in H<sub>2</sub>O.

Figure S6. Calibration curve of FMN in H<sub>2</sub>O.

Figure S7. VB<sub>2</sub> diffusion patterns from VBNFMs in H<sub>2</sub>O.

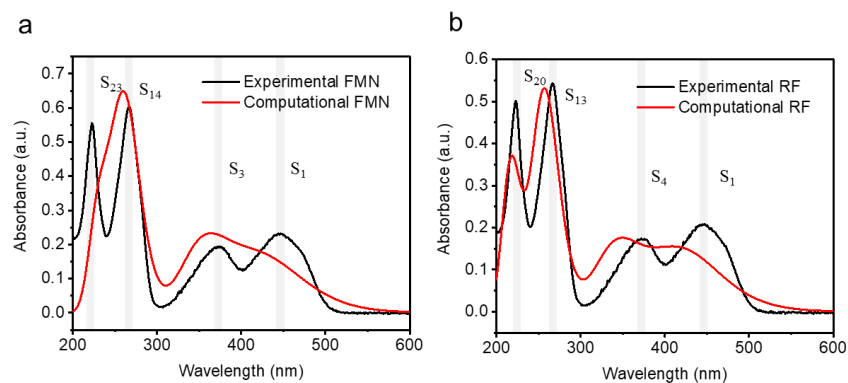

**Figure S1. Computational UV-vis spectra of (a) FMN and (b) RF in H<sub>2</sub>O.**

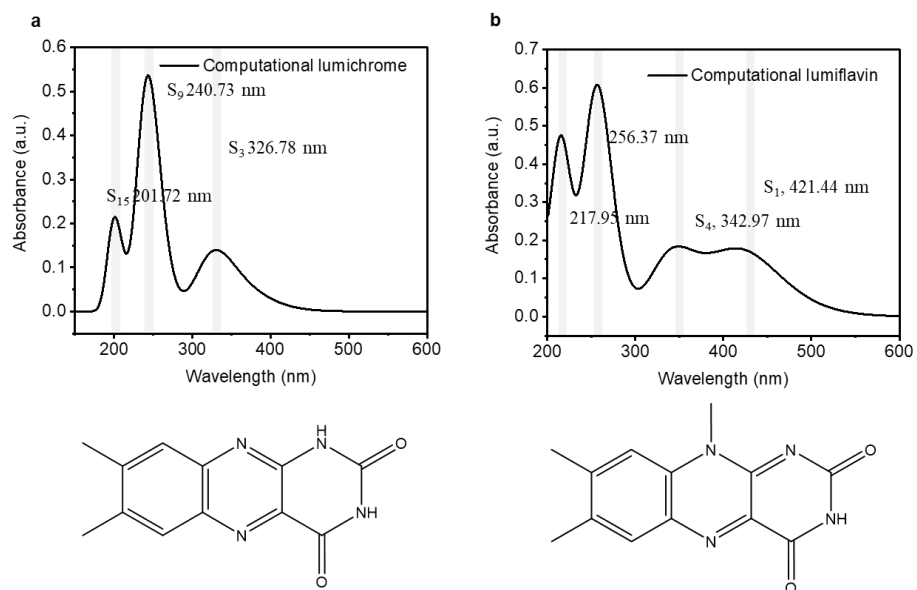

**Figure S2. Computational UV-vis spectra of (a) lumichrome and (b) lumiflavin in H<sub>2</sub>O.**

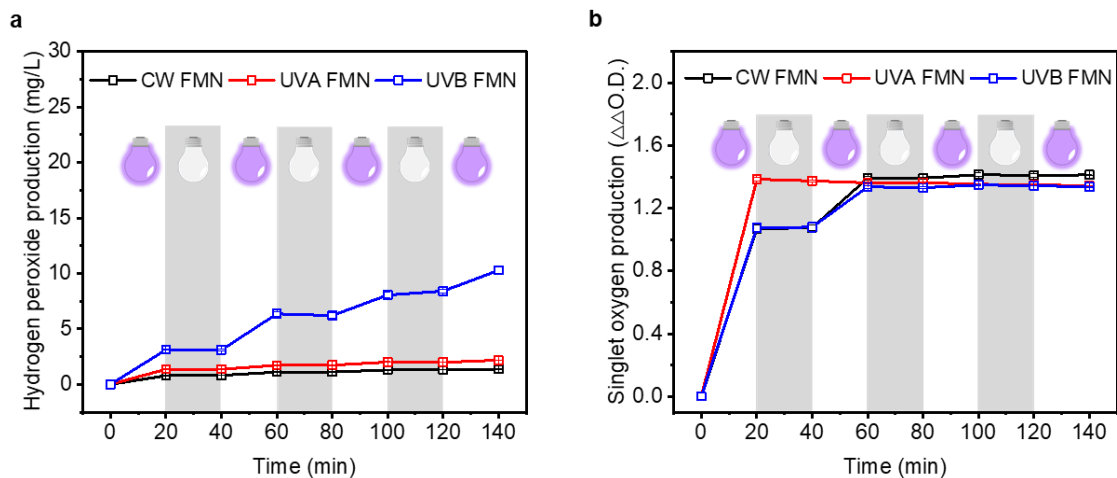

**Figure S3. (a) Hydrogen peroxide and (b) singlet oxygen production of 20  $\mu$ M FMN in 10% EtOH/H<sub>2</sub>O solution under CW, UVA (365 nm), and UVB (312 nm) photoirradiation or dark conditions (irradiation in white and dark periods in gray).**

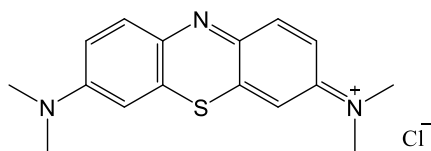

**Figure S4. Chemical structure of Methylene Blue.**

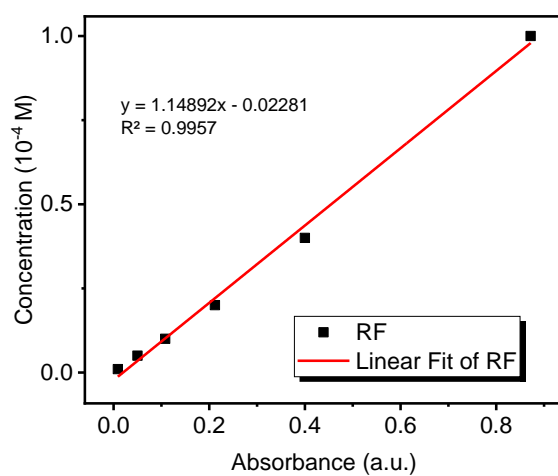

**Figure S5. Calibration curve of RF in H<sub>2</sub>O.**

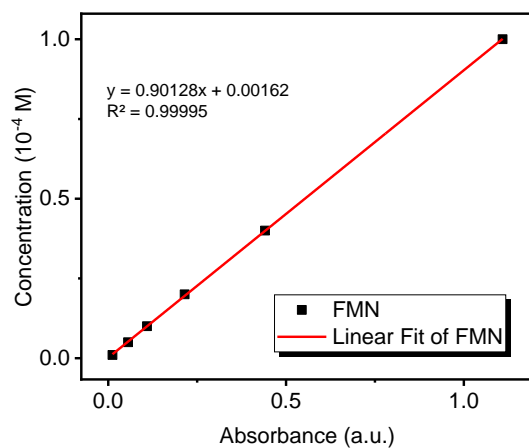

**Figure S6. Calibration curve of FMN in H<sub>2</sub>O.**

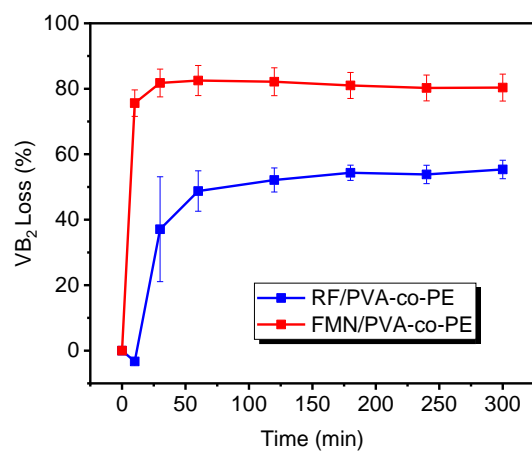

**Figure S7. VB<sub>2</sub> diffusion patterns from VBNFMs in H<sub>2</sub>O.**
